# Supplementary material
Source: publisher site journal article supplement (https://static.cambridge.org/content/id/urn:cambridge.org:id:article:S1041610206004790/resource/name/06-04-06.bird.suppl.table.1.doc)
Supplement: Supplementary file 1 [file 06-04-06.bird.suppl.table.1.doc]

**Table S1. Summary of behaviour problems at baseline.**

|  | Group A (n=33) | Group B (n=22) |
| --- | --- | --- |
| Behaviour description |  |  |
| Aggression which includes violence | 4 | 5 |
| Aggression – verbal | 2 | 1 |
| Physical resistance to personal care | 7 | 3 |
| Verbal disruption/noise making | 6 | 0 |
| Frequent demands of staff | 5 | 0 |
| Intrusive, damaging or dangerous wandering | 3 | 6 |
| Repetitive behaviours | 1 | 2 |
| Unacceptable sexual behaviour | 2 | 0 |
| Problems with feeding | 1 | 0 |
| Distress due hallucinations, delusions | 1 | 1 |
| Unspecified agitation, emotional lability | 1 | 4 |
